# Supplementary figures and images for: Resveratrol Functionalized Carboxymethyl-β-Cyclodextrin: Synthesis, Characterization, and Photostability
Source: Hindawi journal article supplement (doi:10.1155/2018/6789076), 2018-08-01

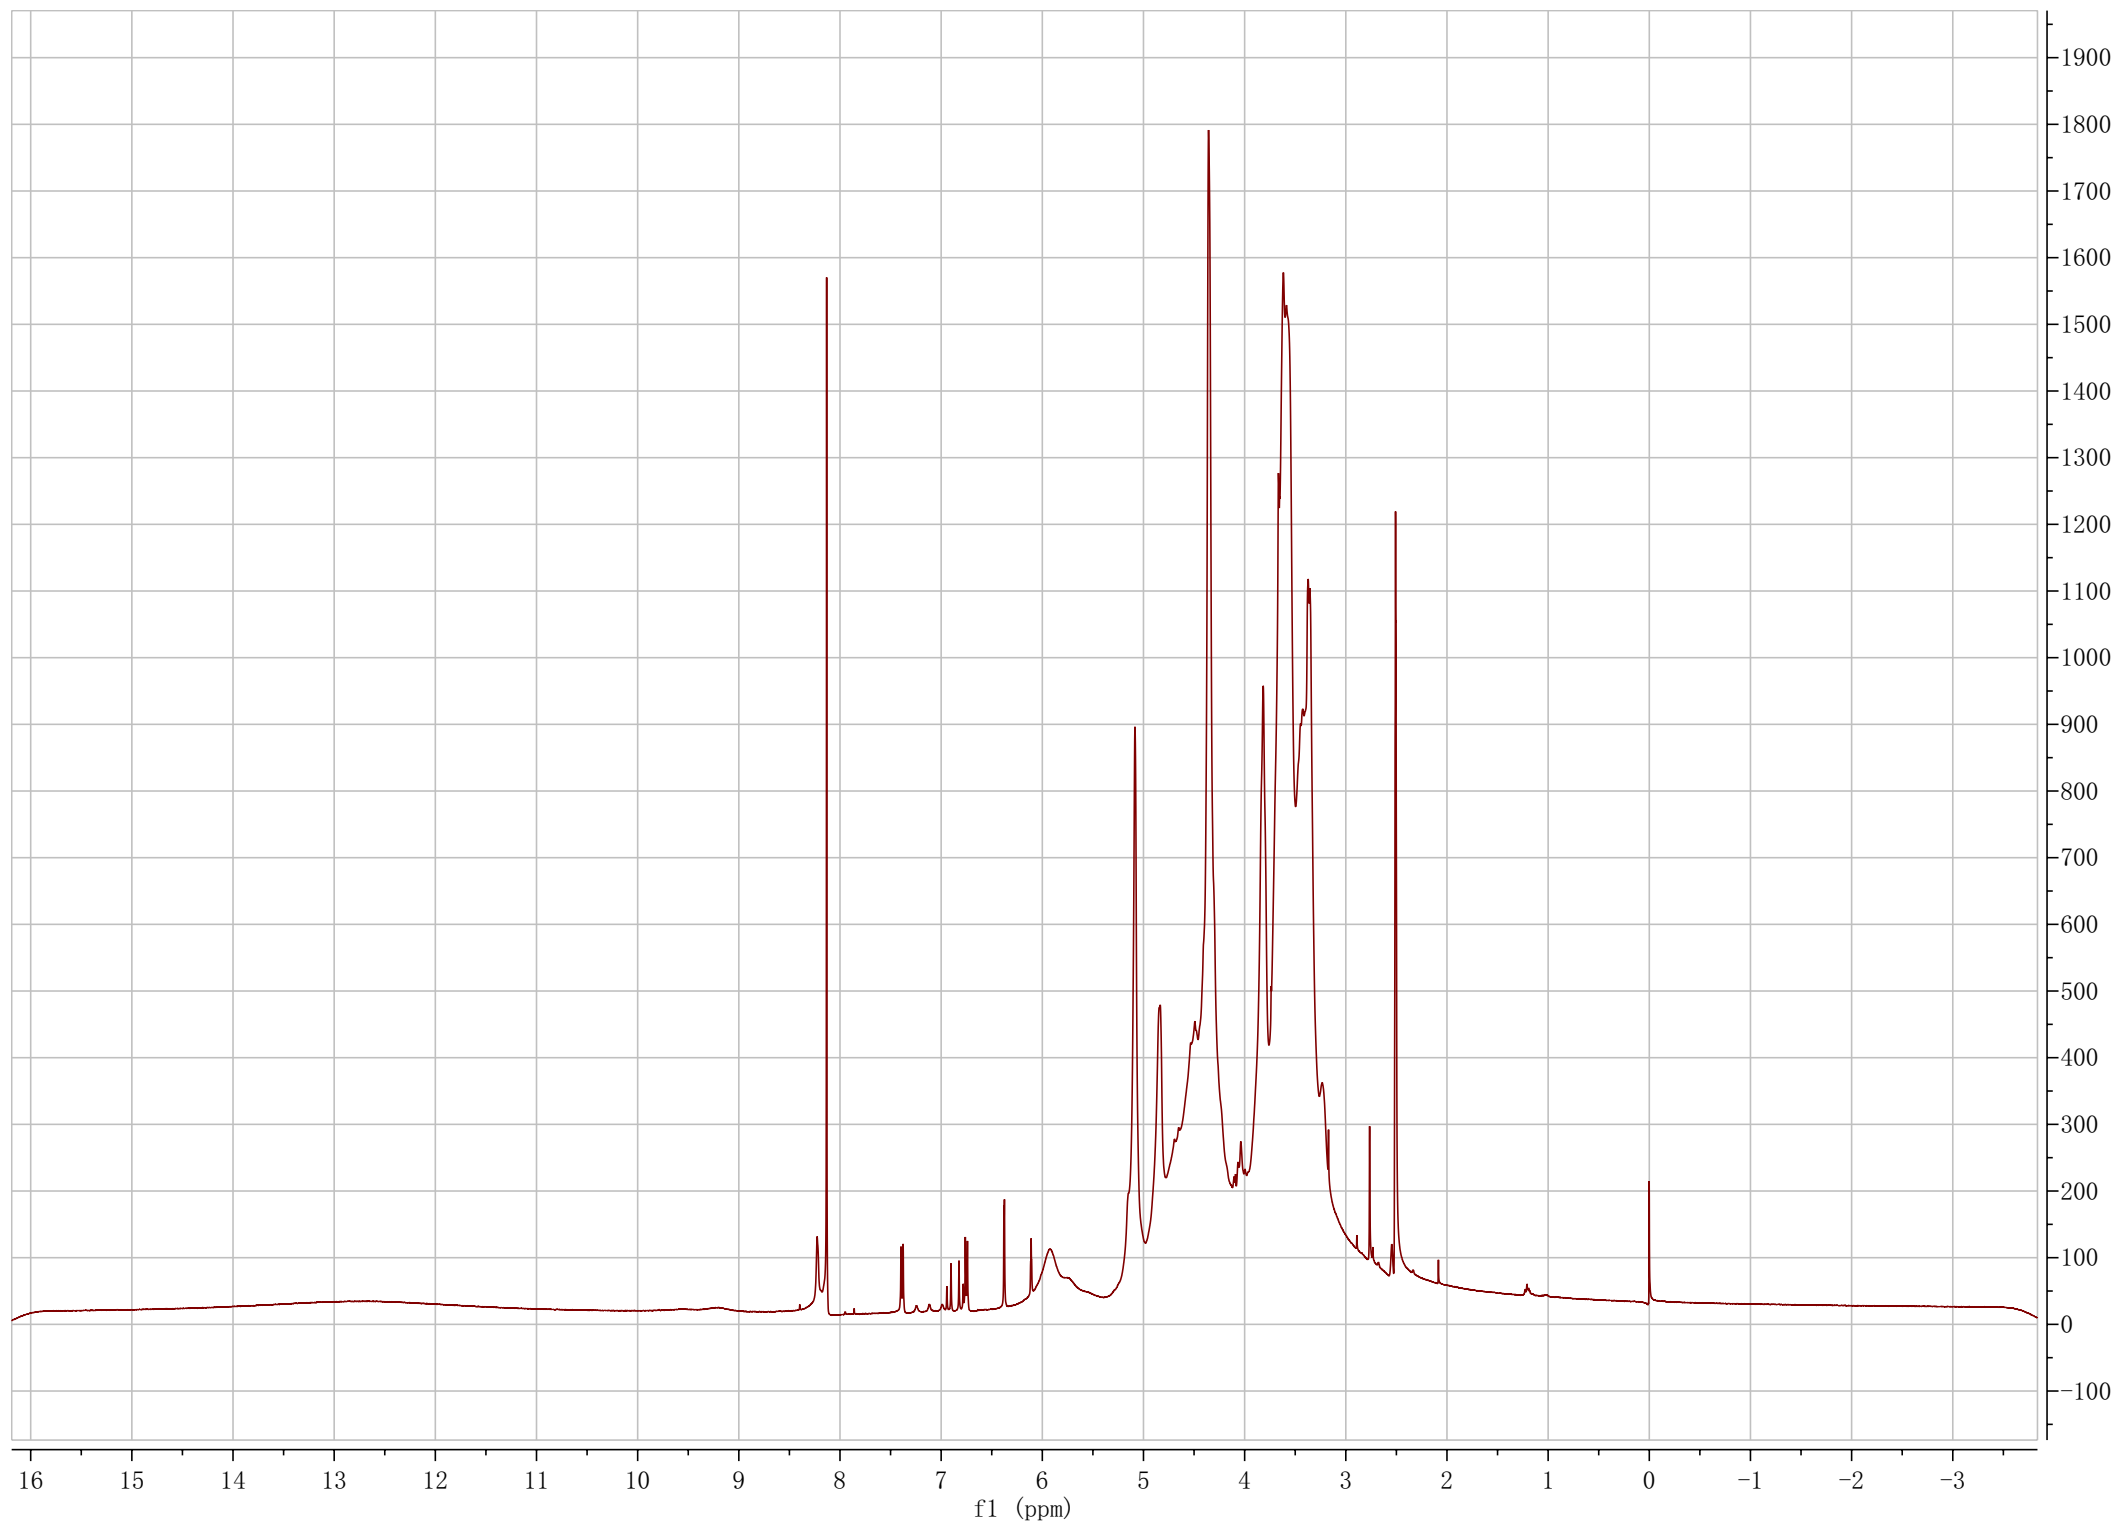

The NMR Data of Conjugate  
TBR-40- <sup>13</sup>C

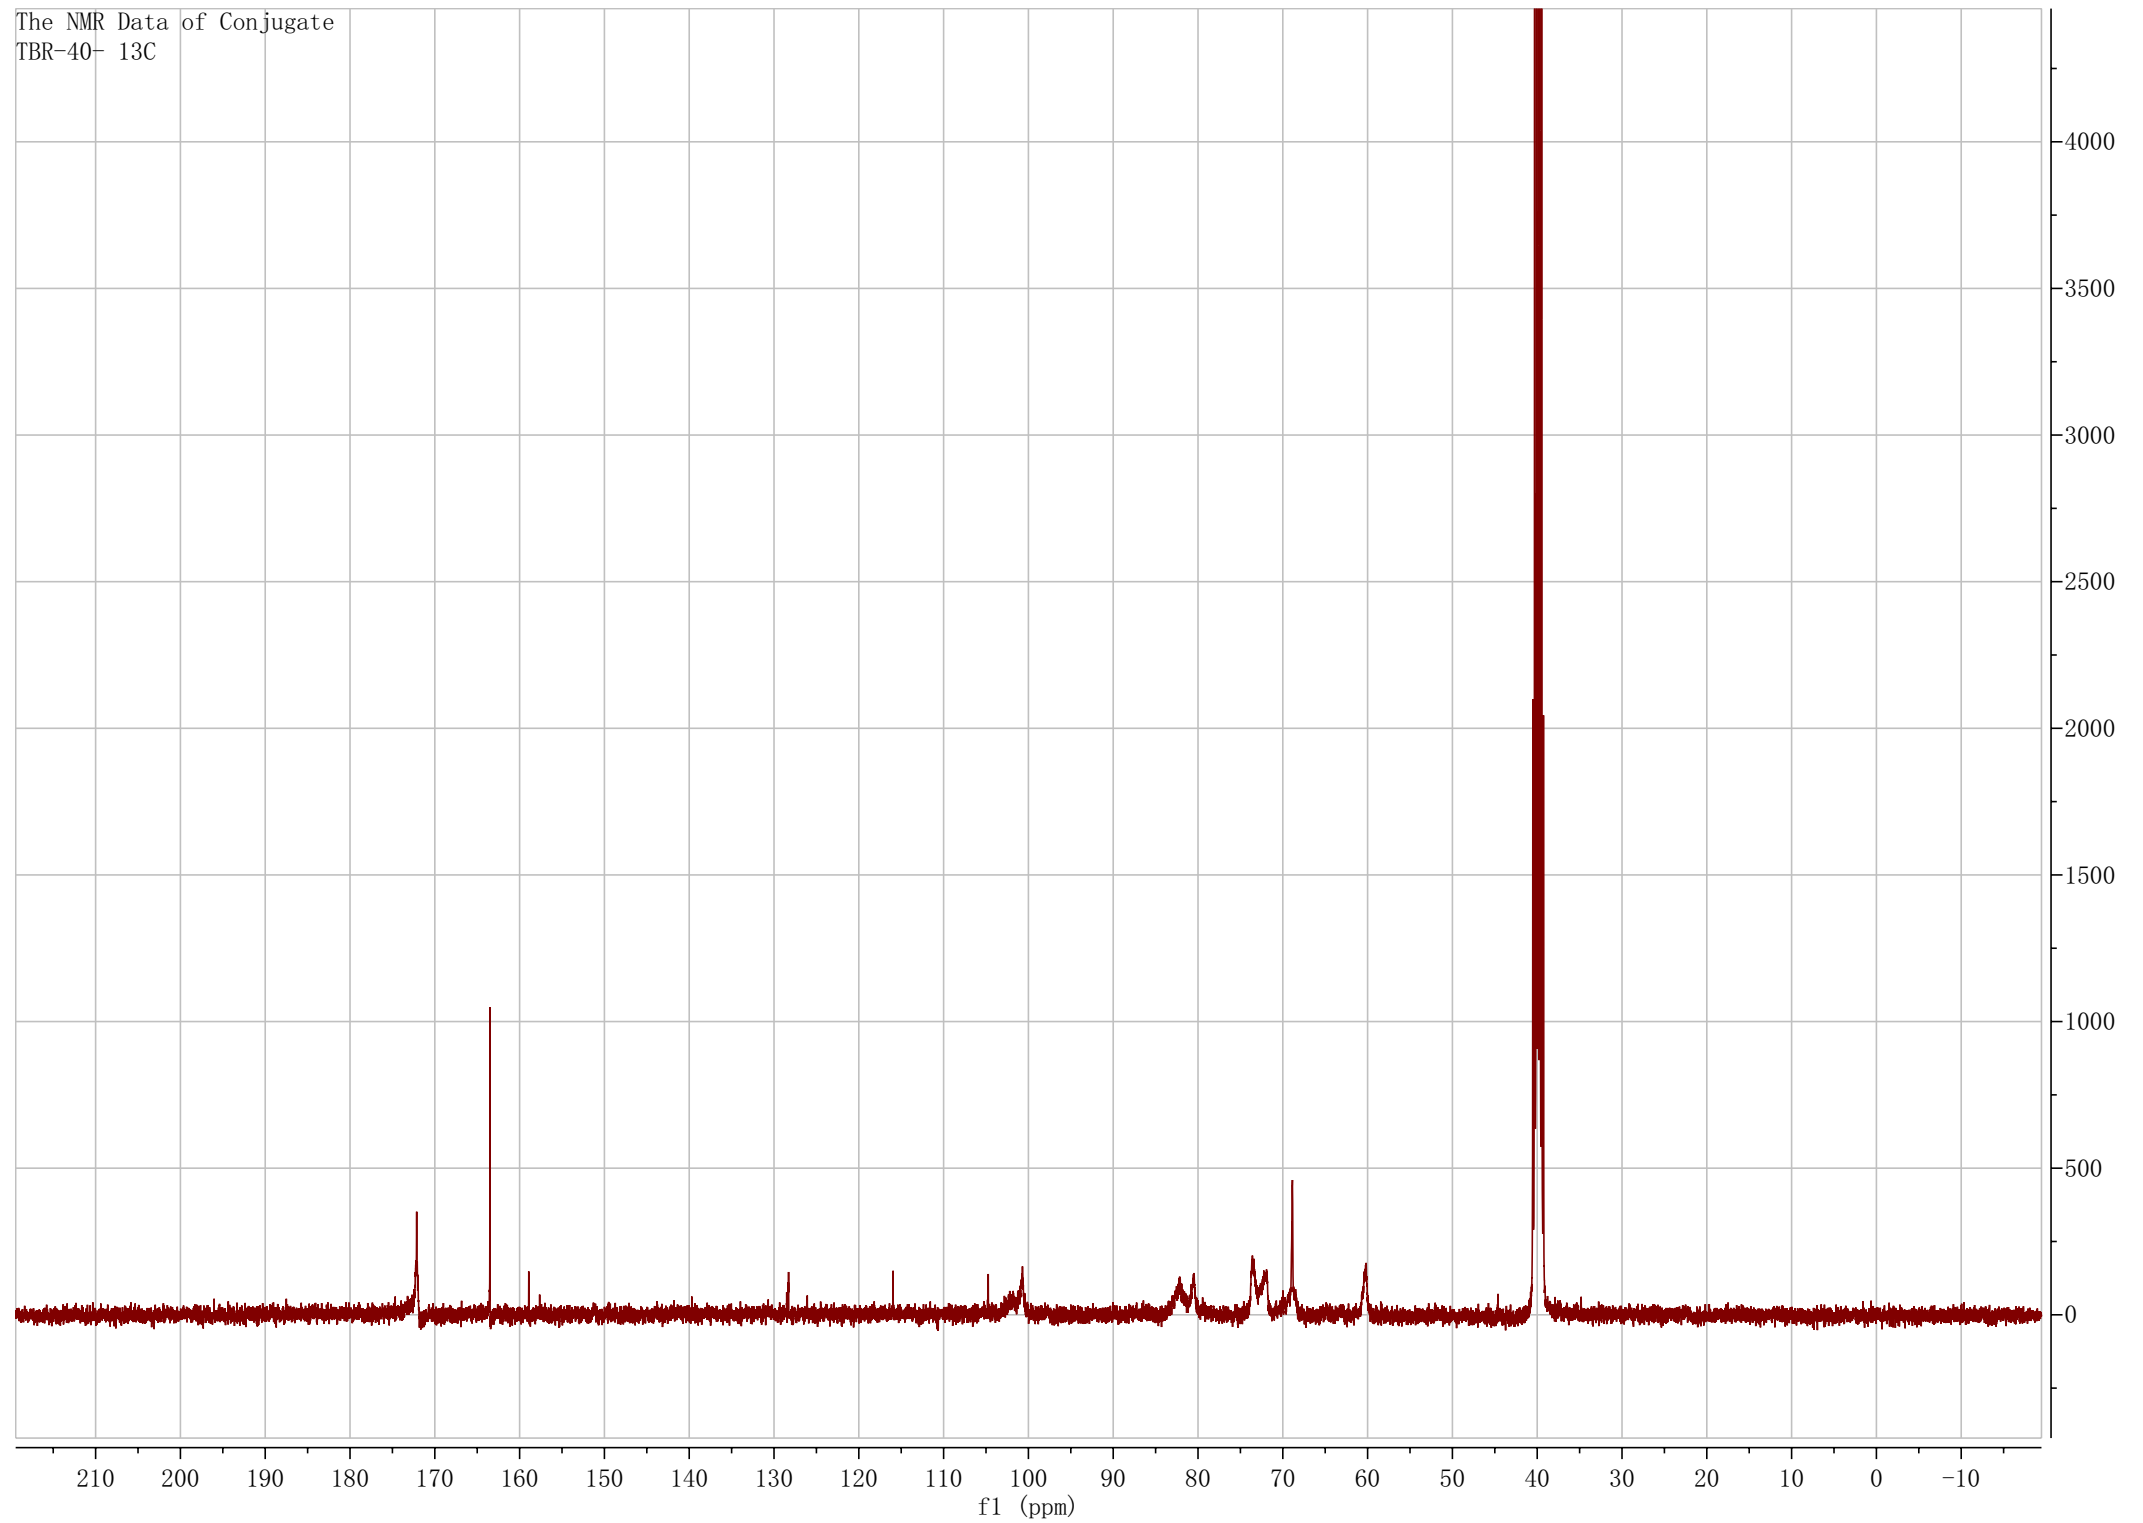

Supplement: f1 [file 6789076.f1.pdf]
